# Supplementary material for: Identification of Novel Breast Cancer Subtype-Specific Biomarkers by Integrating Genomics Analysis of DNA Copy Number Aberrations and miRNA-mRNA Dual Expression Profiling
Source: PubMed Central journal article supplement (PMC4413257; doi:10.1155/2015/746970), 2015-04-15

## Supporting Information

**Table S1. The oligonucleotide sequences**

| Criteria | Gene           | Sequence (5'-3')                   |
|----------|----------------|------------------------------------|
| siRNA    | siBRCA1 target | GGAACCUGUCUCCACAAAG                |
| qRT-PCR  | BRCA1          | Forward: GGAACTAACCAAACGGAGCA      |
|          |                | Reverse: TAGGTTTCTGCTGTGCCTGA      |
|          | $\beta$ -actin | Forward: TCACCCACACTGTGCCCATCTACGA |
|          |                | Reverse: CAGCGGAACCGCTCATTGCCAATGG |
|          | pri-miR-143    | Forward: TCCCCTCTAACACCCCTTCTC     |
|          |                | Reverse: CACTCCTCCTGCCCAAGA        |
|          | pre-miR-143    | Forward: TGAGGTGCAGTGCTGCATC       |
|          |                | Reverse: GCTACAGTGCTTCATCTCAGACTC  |
|          | pri-miR-145    | Forward: TGGATTGCCTCCTTCCCA        |
|          |                | Reverse: TTGAACCCTCATCCTGTGAGCC    |

|         |             |                                           |
|---------|-------------|-------------------------------------------|
|         | pre-miR-145 | Forward: CTTGTCCTCACGGTCCAGTT             |
|         |             | Reverse: ATTTCCAGGAATCCCCATCT             |
|         | hRNU6-1b    | Forward: CTCGCTTCGGCAGCACA                |
|         |             | Reverse: AACGCTTCACGAATTTGCGT             |
| pmirGLO | miR-143     | Forward: GCGAATTCGCGGAGCAGCGCAGCGCCCT     |
|         |             | Reverse: GCGTCGACTGGCTGCAGAACAACCTTCTCT   |
|         | miR-145     | Forward: GCGAATTCGGCGGCCTTGGCGCTGAAGGCCAC |
|         |             | Reverse: GCGTCGACTGGGGTGGGAAGGAGGCAAATCCA |

Figure S1 The Bayesian network construction process

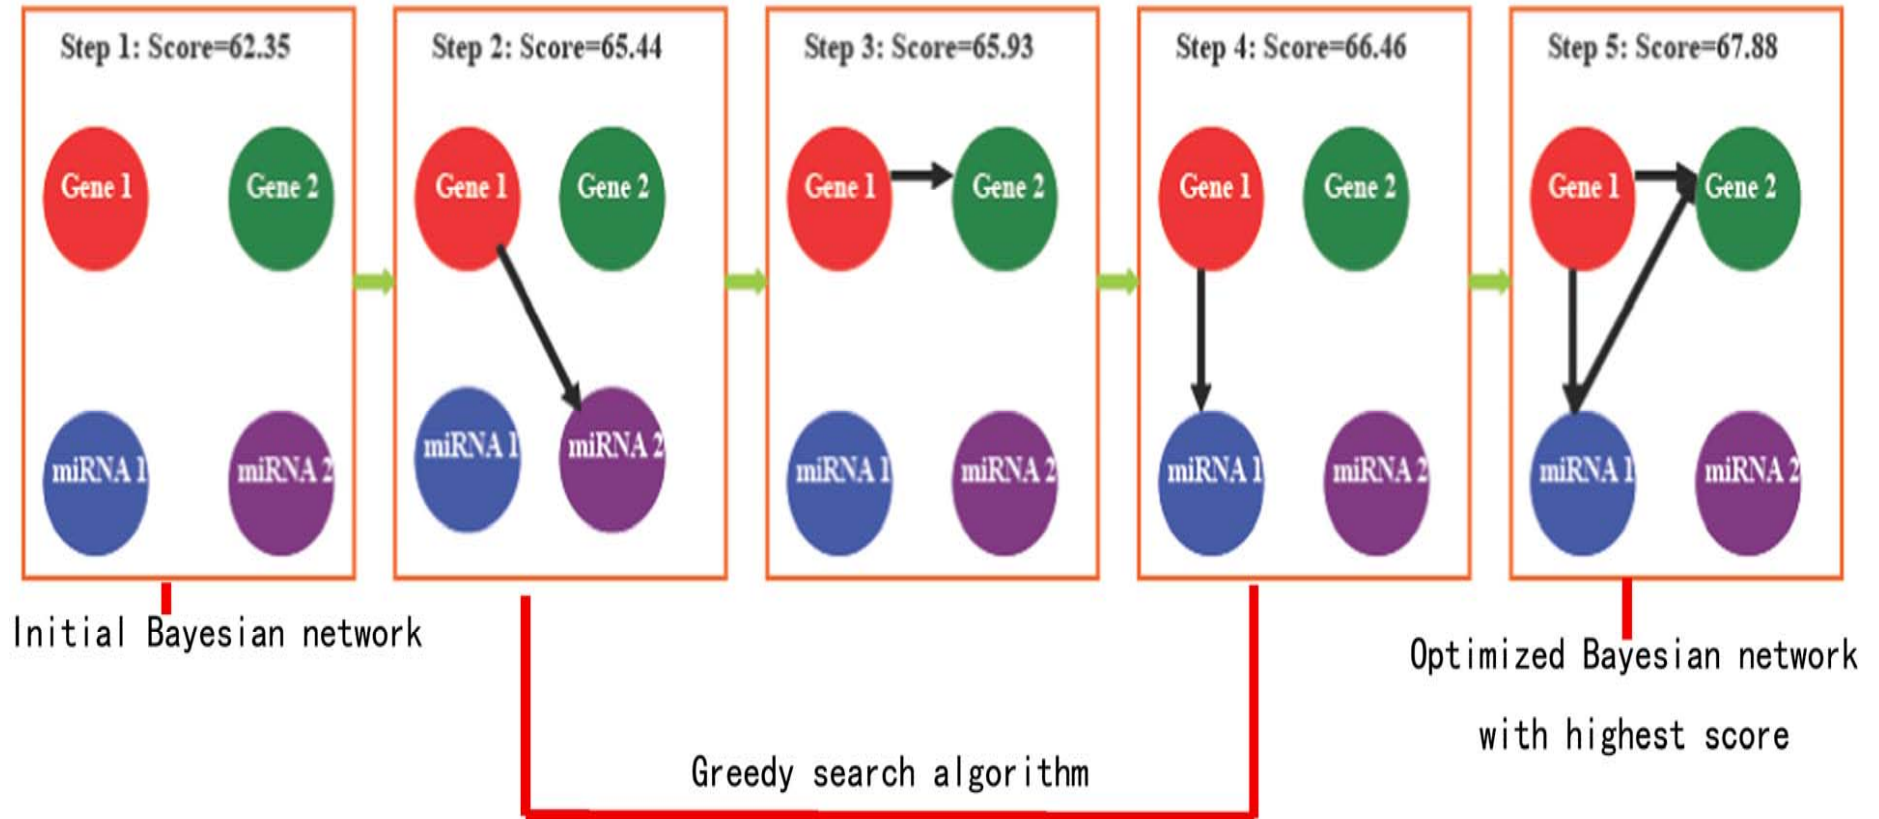

**Figure S2 The highest counts of CNA regions for a luminal-A subtype and a basal-like subtype**

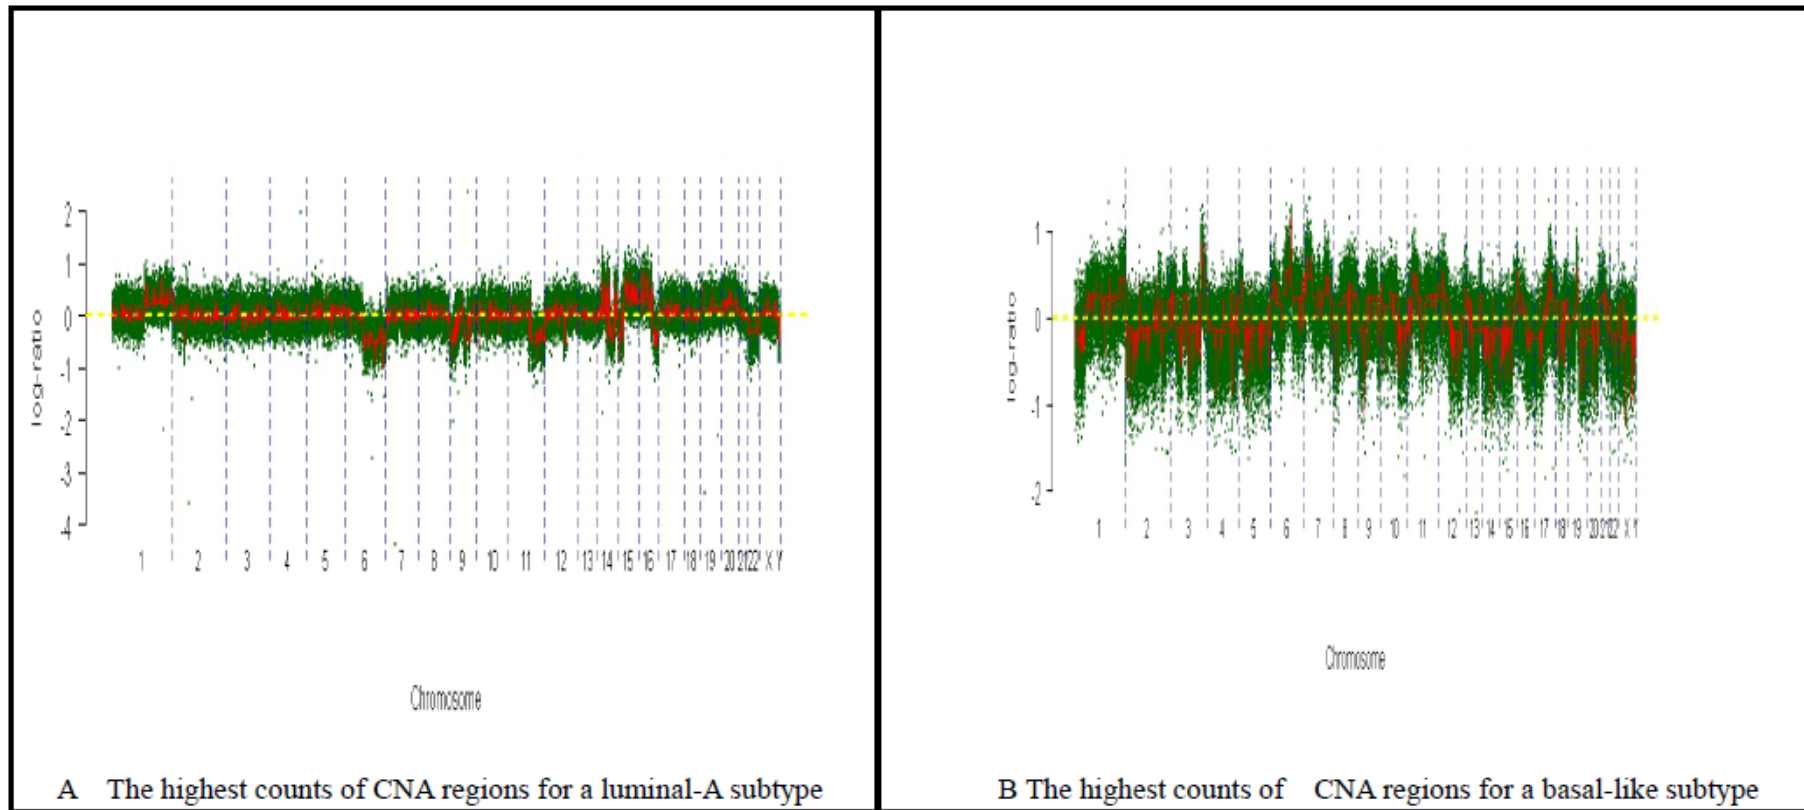

(A) The highest counts of CNA regions for a luminal-A subtype (B) The highest counts of CNA regions for a basal-like subtype.

Figure S3 The average gene expression of four gene groups

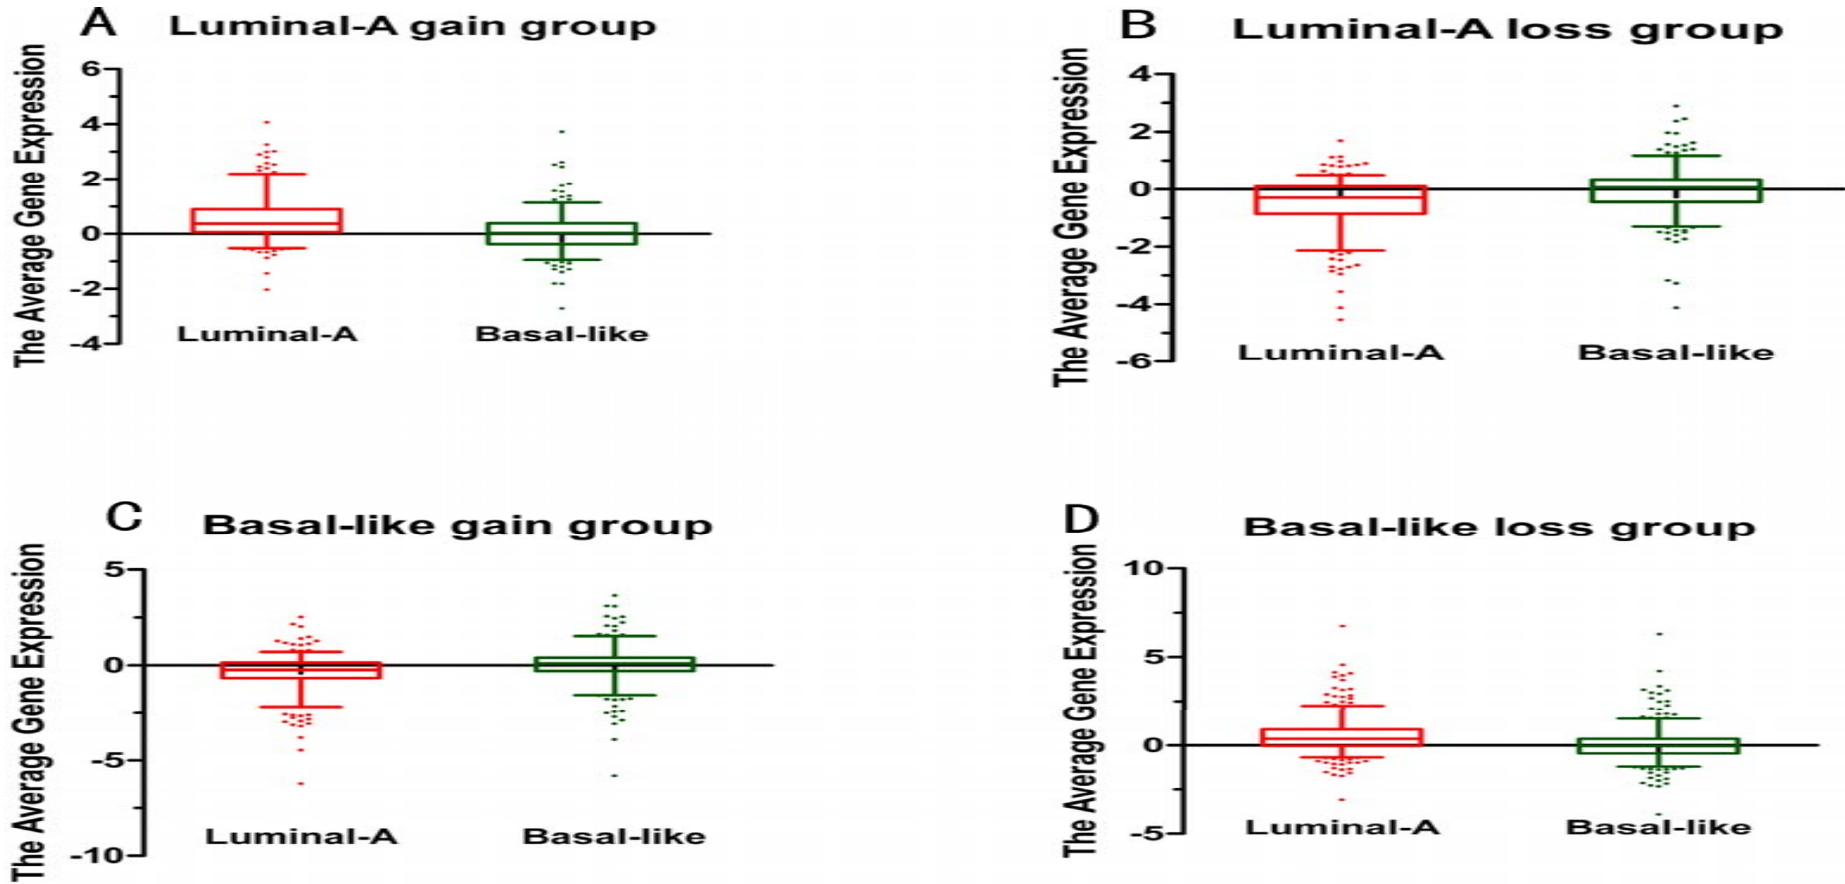

Note: The Average Gene Expression indicates the average expression value of genes involved in the corresponding sample group.

Figure S4 Kaplan-Meier (KM) survival analysis for genes involved in the identified network motifs

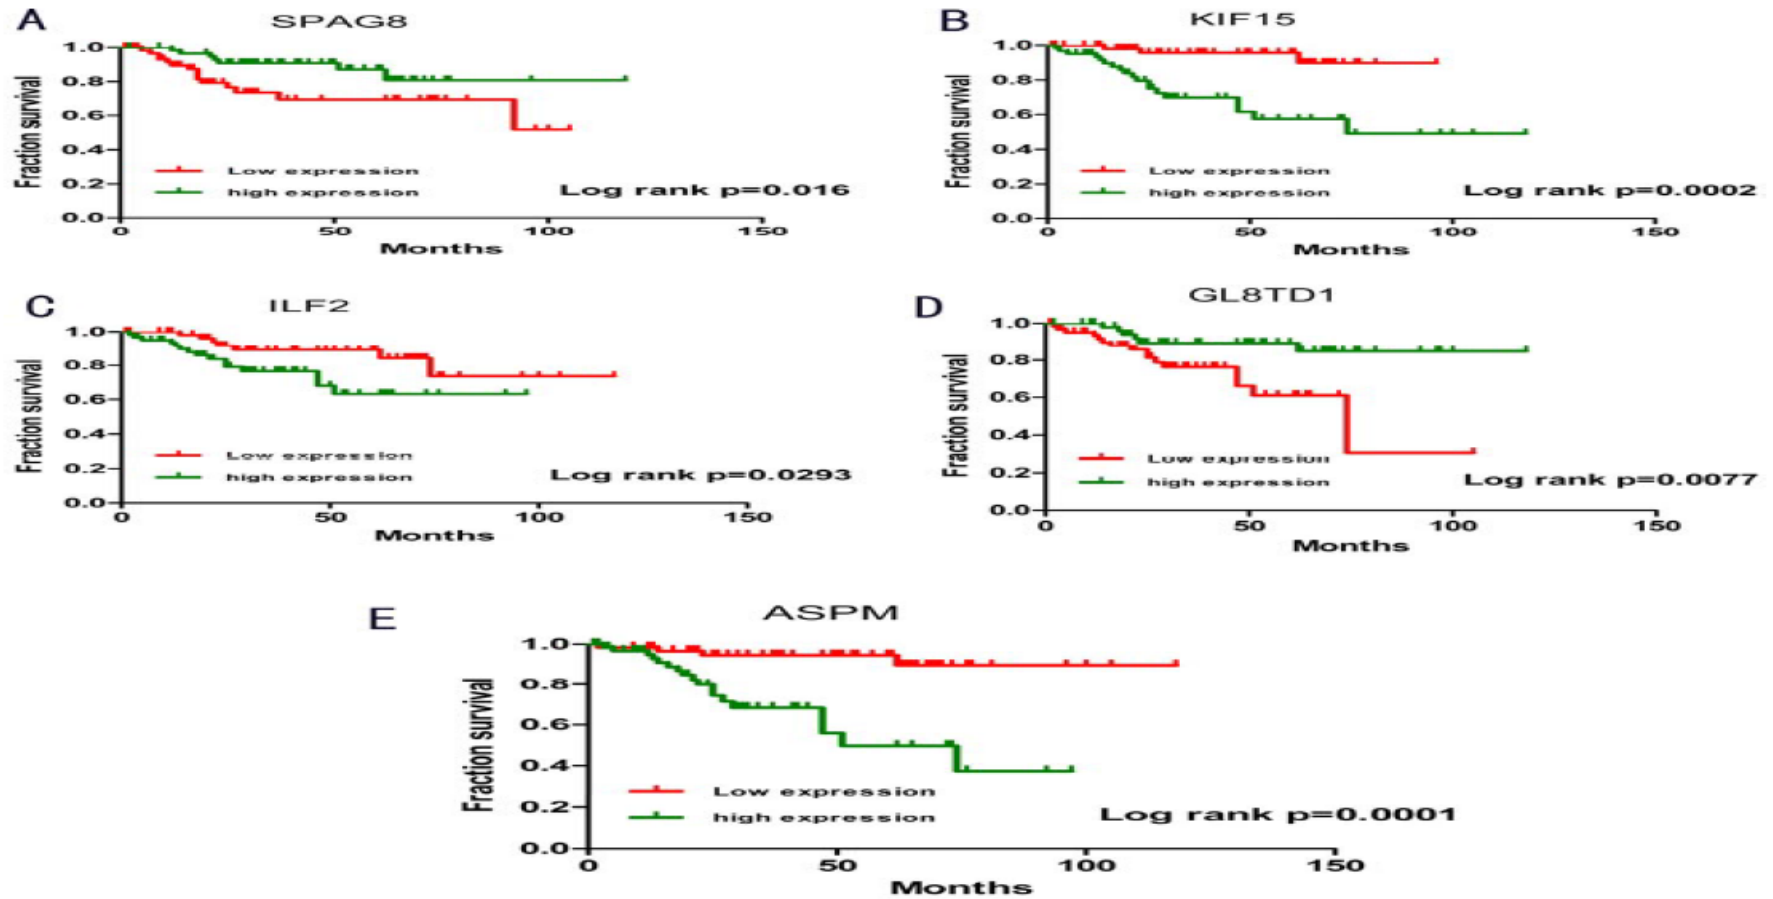

Supplement: 746970.f1.pdf [file 746970.f1.pdf]
